1 **Spatial correlations and distribution of competence gene expression**  
2 **in biofilms of *Streptococcus mutans***

3  
4 **Ivan P. Ishkov<sup>1</sup>, Justin R. Kaspar<sup>2</sup>, Stephen J. Hagen<sup>1\*</sup>**

5  
6 <sup>1</sup>Department of Physics, University of Florida, Gainesville, FL, USA

7 <sup>2</sup>Department of Oral Biology, College of Dentistry, University of Florida, Gainesville, FL, USA

8  
9  
10  
11  
12  
13  
14  
15  
16  
17  
18 \* Correspondence:

19 Stephen J. Hagen

20 [sjhagen@ufl.edu](mailto:sjhagen@ufl.edu)

21  
22  
23  
24  
25  
26 Keywords: *Streptococcus mutans*, bimodality, fluorescence, biofilm, confocal, multi-photon,  
27 comX, quorum sensing

28  
29  
30  
31 Abstract length: 198 words

32 Manuscript length: 5834 words

33 Number of figures: 6

34 Number of tables: 1

35 Number of Supplementary figures: 8

36

37 **ABSTRACT**

38 *Streptococcus mutans* is an important pathogen in the human oral biofilm. It expresses  
39 virulent behaviors that are linked to its genetic competence regulon, which is controlled by *comX*.  
40 Expression of *comX* is modulated by two diffusible signaling peptides, denoted CSP and XIP, and  
41 by other environmental cues such as pH and oxidative stress. The sensitivity of *S. mutans*  
42 competence to environmental inputs that may vary on microscopic length scales raises the question  
43 of whether the biofilm environment causes spatial clustering of *S. mutans* virulence behaviors, by  
44 creating microniches where competence and related phenotypes are concentrated. We have used  
45 two-photon microscopy to characterize the spatial distribution of *comX* expression among  
46 individual *S. mutans* cells in biofilms. By analyzing correlations in *comX* activity, we test for  
47 spatial clustering that may suggest localized, competence microenvironments. Our data indicate  
48 that both competence-signaling peptides diffuse efficiently through the biofilm. CSP triggers a  
49 Poisson-like, spatially random, *comX* response from a subpopulation of cells that is  
50 homogeneously dispersed. XIP elicits a population-wide response. Our data indicate that  
51 competence microenvironments if they exist are small enough that the phenotypes of individual  
52 cells are not clustered or correlated to any greater extent than occurs in planktonic cultures.

53

## 54 INTRODUCTION

55 Oral biofilms are complex microbial communities that may be inhabited by pathogenic as  
56 well as commensal species. As a primary etiological agent of dental caries in humans,  
57 *Streptococcus mutans* is an important biofilm pathogen (Loesche, 1986; Takahashi and Nyvad,  
58 2011). It forms thick and densely clustered biofilms, especially in the presence of sucrose (Kreth  
59 et al., 2004; Leme et al., 2006), consisting of cell clusters embedded in a matrix of insoluble  
60 exopolysaccharides, extracellular DNA and other secretions (Watnick and Kolter, 2000; Branda  
61 et al., 2005; Xiao and Koo, 2010; Koo et al., 2013). The resulting biofilm is chemically and  
62 physically heterogeneous, with parameters such as pH and oxygen concentration varying on  
63 microscopic length scales. For example, *S. mutans* fermentation of carbohydrates from the host  
64 diet gives rise to localized microenvironments of reduced pH in the oral biofilm (Bowen et al.,  
65 2018). At the tooth surface, these acidic niches promote dental caries by demineralizing the tooth  
66 enamel (Hunter and Beveridge, 2005; Leme et al., 2006; Takahashi and Nyvad, 2011; Guo et al.,  
67 2013; Koo et al., 2013).

68 In addition to biofilm formation and acid production, the cariogenic behaviors of *S. mutans*  
69 include its acid tolerance, carbohydrate utilization, and production of bacteriocins. These  
70 behaviors are regulated in connection with the regulation of genetic competence, a transient  
71 physiological state in which the microbe can take up and incorporate exogenous DNA (Yoshida  
72 and Kuramitsu, 2002; Qi et al., 2004; Ahn et al., 2005, 2006; Senadheera et al., 2005, 2012; van  
73 der Ploeg, 2005; Kreth et al., 2006; Welin-Neilands and Svensäter, 2007). The competence  
74 pathway in *S. mutans* is sensitive to diffusible signaling peptides as well as to pH, nutrient, and  
75 other environmental cues. Because these behaviors are strongly influenced by environmental  
76 inputs, one may anticipate that chemical microniches and restricted diffusion within the biofilm  
77 shape the spatial distribution of competence gene expression. This raises the question of how  
78 virulence behavior is distributed spatially throughout a biofilm, and particularly whether  
79 expression is uniformly distributed, or is concentrated or localized into discrete, pathogenic  
80 microniches (Stewart, 2003; Parsek and Greenberg, 2005; Hense et al., 2007; Stewart and Franklin,  
81 2008; Bowen et al., 2018).

82 In streptococci the competent state requires the expression of *comX* (also called *sigX*),  
83 which encodes an alternative sigma factor for the late competence genes (Cvitkovitch, 2001;  
84 Fontaine et al., 2015; Shanker and Federle, 2017). In *S. mutans*, the activation of *comX* is  
85 modulated by inputs such as pH, oxidative stress, and the availability of carbohydrate and peptide  
86 nutrients. It is also controlled by two diffusible signaling peptides, denoted XIP (*sigX* inducing  
87 peptide) and CSP (c̄ompetence s̄timulating peptide). XIP and CSP stimulate the ComRS  
88 transcriptional feedback loop through different mechanisms and therefore elicit qualitatively  
89 different responses from *comX* in a population of cells (Ahn et al., 2006; Ahn and Burne, 2007;  
90 Son et al., 2012, 2015; Guo et al., 2014; Moye et al., 2016; De Furio et al., 2017; Hagen and Son,  
91 2017; Shanker and Federle, 2017).

92 CSP is produced from its precursor ComC, exported, and then cleaved to length 18 aa.  
93 Extracellular CSP interacts with the ComDE two-component system to drive expression of

94 multiple genes associated with bacteriocin production and immunity. Through a mechanism that  
95 is not fully known, ComDE stimulates the ComRS system, which is the immediate regulator of  
96 *comX*. ComR is an Rgg-like cytosolic regulator that interacts with the 7-residue XIP or its 17-  
97 residue precursor ComS to form a transcriptional activator for both *comS* and *comX* (Mashburn-  
98 Warren et al., 2010; Shanker and Federle, 2017; Underhill et al., 2019). When CSP is provided to  
99 the cell, the ComRS system functions as a noisy, intracellular transcriptional feedback loop. The  
100 loop can persist in either the *ON* (high ComS) or *OFF* (low ComS) state but is stimulated by CSP;  
101 exogenous CSP therefore triggers a subpopulation of cells (20-40% in planktonic cultures) to  
102 switch *ON* and activate *comX* while the rest of the population remains *OFF* (Ferrell, 2002; Son et  
103 al., 2012). Bimodal expression of *comX* is a signature property of stimulation by CSP.

104 By contrast, exogenous XIP can elicit a unimodal response from *comX*: Although *comX*  
105 expression in response to XIP varies from cell to cell, it occurs population-wide and is therefore  
106 qualitatively unlike the bimodal response to CSP. The unimodal response can be attributed to the  
107 import of extracellular XIP (through the Opp permease), which directly interacts with ComR,  
108 bypassing the role of endogenous ComS/XIP in triggering the autofeedback loop. Owing to an  
109 interaction of growth media with the feedback loop, *comX* responds to XIP only in chemically  
110 defined media, whereas it responds to CSP only in complex growth media, rich in small peptides  
111 (Hagen and Son, 2017).

112 The important role of diffusible signals, as well as variables such as pH and oxygen  
113 concentration, raises the question of whether *comX* activity in biofilms of *S. mutans* is affected by  
114 limited diffusibility within the biofilm matrix, localized chemical gradients, or other  
115 physical/chemical factors that are heterogeneous at micron length scales. If activation of *comX*  
116 requires exchange of XIP or other signals that diffuse poorly through the matrix or are degraded  
117 in transit, then cells activating pathogenic behaviors linked to *comX* could exhibit some tendency  
118 to collocate or cluster (Parsek and Greenberg, 2005; Decho et al., 2010). Here we test this  
119 hypothesis using two-photon confocal microscopy to probe at single-cell resolution the expression  
120 of competence genes throughout the depth of *S. mutans* biofilms. By applying statistical tests  
121 derived from spatial ecology we assess the evidence for clustering versus spatial randomness in  
122 *comX* active cells. Our data allow us to evaluate the diffusibility of the signaling peptides XIP and  
123 CSP and characterize the length scale of any microniches of competence activity.

124  
125

126 **METHODS**

127

128 **Strains**

129

130 Table 1 shows the UA159-derived strains used in this study. To detect activation of *comX*  
131 in *S. mutans* biofilms, and to identify non-expressing cells, we used a dual reporting strain. The *S.*  
132 *mutans* UA159 pGBE-*PcomX::gfp* / pDL278-P23::DsRed-Express2 strain was constructed using  
133 plasmid pDL278-P23::DsRed-Express2, which constitutively drives production of the DsRed-  
134 Express2 fluorescent protein encoded on the *E.coli*-streptococcal shuttle vector pDL278 (Shields  
135 et al., 2019). The plasmid was transformed into a strain of *S. mutans* UA159 which harbors green  
136 fluorescent protein (*gfp*) fused to the promoter region of *comX*, integrated into the chromosome at  
137 the *gtfA* site using plasmid pGBE (Son et al., 2018). Plasmid DNA was introduced into *S. mutans*  
138 by natural transformation using synthetic CSP peptide (sCSP, see below) synthesized by the  
139 Interdisciplinary Center for Biotechnology Research (ICBR) facility at the University of Florida  
140 with > 95% purity. The CSP was reconstituted in water to a final concentration of 2 mM and stored  
141 in 100  $\mu$ L aliquots at -20°C.

142 For transformations, a final concentration of 2  $\mu$ M sCSP was added to growing *S. mutans*  
143 UA159 pGBE-*PcomX::gfp* cultures as they reached OD<sub>600 nm</sub> = 0.2 along with 500 ng of pDL278-  
144 P23::DsRed-Express2. After 3 h of additional growth, transformants were plated on BHI agar with  
145 the appropriate antibiotics for selection. The strain was then confirmed by PCR using pDL278-  
146 specific primers (F - TCA ACT GCC TGG CAC AAT AA; R - TTT GCG CAT TCA CAG TTC  
147 TC) and then sequencing of the P23::DsRed-Express2 insert region (Eurofins Genomics). For  
148 controls we utilized a constitutively expressing *gfp* reporter under control of the *ldh* promoter as  
149 well as UA159 carrying an empty pDL278 plasmid (Ishkov et al., 2020).

150 The 18-residue form of CSP (SGSLSTFFRLFNRSFTQA) was used throughout. For  
151 imaging studies, synthetic CSP, purified to 98%, was provided by NeoBioSci (Cambridge, MA,  
152 USA). The rhodamine-B labeled CSP ( [Rhod\_B] SGSLSTFFRLFNRSFTQA) was synthesized  
153 by Pierce Biotechnology (Rockford, IL, USA) and purified to >90%. Synthetic XIP peptide  
154 GLDWWSL, corresponding to residues 11–17 of ComS, purified to 96%, was prepared by  
155 NeoBioLab (Woburn, MA, USA).

156

157

| Strain or plasmid                                                       | Genotypes and/or descriptions                                                                                                                      | Source or reference                |
|-------------------------------------------------------------------------|----------------------------------------------------------------------------------------------------------------------------------------------------|------------------------------------|
| <b><i>S. mutans</i> strains</b>                                         |                                                                                                                                                    |                                    |
| UA159                                                                   | Wild-type                                                                                                                                          | ATCC 700610                        |
| UA159/pDL278                                                            | Wild-type harboring an empty plasmid pDL278, Sp <sup>r</sup>                                                                                       | (Ishkov <i>et al.</i> , 2020)      |
| UA159/ <i>Pldh-gfp</i>                                                  | UA159 harboring <i>Pldh-gfp</i> promoter fusion on pDL278, Sp <sup>r</sup>                                                                         | (Ishkov <i>et al.</i> , 2020)      |
| UA159/ <i>PcomX-gfp</i> (plasmid-based reporter)                        | UA159 harboring <i>PcomX-gfp</i> promoter fusion on pDL278, Sp <sup>r</sup>                                                                        | (Son, Minjun <i>et al.</i> , 2012) |
| UA159/ <i>PcomX-gfp/P23-rfp</i> (chromosomal <i>PcomX-gfp</i> reporter) | Chromosomally integrated <i>PcomX-gfp</i> harboring a <i>P23-DsRed-Express2</i> red fluorescent protein promoter fusion on pDL278, Sp <sup>r</sup> | This Study                         |
| UA159/ <i>Pxyl-gfp</i>                                                  | UA159 harboring <i>Pxyl-gfp</i> promoter fusion on pZX9, Sp <sup>r</sup>                                                                           | (Shields <i>et al.</i> , 2020)     |
| <b>Plasmid</b>                                                          |                                                                                                                                                    |                                    |
| pDL278                                                                  | <i>E. coli</i> – <i>Streptococcus</i> shuttle vector, Sp <sup>r</sup>                                                                              | (LeBlanc <i>et al.</i> , 1992)     |
| pZX9                                                                    | <i>Streptococcal</i> replicon with xylose-inducible cassette, Sp <sup>r</sup>                                                                      | (Xie <i>et al.</i> , 2013)         |
| <i>Sp. spectinomycin</i>                                                |                                                                                                                                                    |                                    |

158 **Table 1: Strains and Plasmids used**

159

160 **Growth Conditions**

161

162 We grew *S. mutans* from glycerol stocks overnight in BBL Brain Heart Infusion (BHI).  
 163 Strains were grown in an incubator at 37 C and 5% CO<sub>2</sub> overnight in medium that contained 1 mg  
 164 ml<sup>-1</sup> spectinomycin. Cultures were then washed twice by centrifugation and then diluted 25-fold  
 165 in either complex medium (BHI) or defined medium (FMC) (Terleckyj *et al.*, 1975; De Furio *et*  
 166 *al.*, 2017). To facilitate biofilm growth, we supplemented media with either 10 mM sucrose (BHI)  
 167 or 5 mM sucrose and 15 mM glucose (FMC), both with 1 mg ml<sup>-1</sup> spectinomycin added. We loaded  
 168 300 µl of the prepared culture into a stationary 8 well slide (µ-Slide 8 well glass bottom, Ibidi  
 169 USA), which was allowed to form a mature biofilm in absence of flow. The Ibidi slide consists of  
 170 an array of 8 square wells (each 9.4 x 10.7 x 6.8 mm deep) with a glass coverslip bottom that  
 171 allows the developing biofilm to be observed and imaged with an inverted microscope. Except  
 172 where stated, the supernatant was exchanged with fresh growth medium after 5 hours of growth.  
 173 For biofilms that were tested with an inducer peptide, 1 µM CSP or 1 µM (rhodamine B)-CSP (for

174 BHI medium) or 500 nM XIP (for FMC medium) was added. The culture in the 8 well slide was  
175 then returned to the incubator for an additional 2 hours before imaging.

176

## 177 **CLSM fluorescence imaging of biofilms**

178

179 For confocal and multiphoton imaging, biofilms of the *S. mutans* wild-type UA159 and  
180 mutant strains were grown in multiwell Ibidi slides. To reduce image noise and enhance green  
181 fluorescence, slides were gently washed by removing the growth medium and replacing it with a  
182 phosphate buffer solution (Yoshida and Kuramitsu, 2002). Two-photon fluorescence images of the  
183 intact biofilms were collected using a Nikon A1RMP Multiphoton Microscope on an Eclipse Ti-  
184 E inverted fluorescent microscope frame with a Spectra-Physics Mai-Tai HP DS (Deep See) IR  
185 variable (690-1040 nm) pulse laser set to an excitation wavelength of 920 nm. For conventional  
186 confocal laser scanning (CLSM) imaging, the excitation source was an LU-N4 Laser Unit set to  
187 488 and 561 nm excitation wavelengths, passed through 525/50 nm and 595/50 nm filter sets  
188 respectively. Images were acquired using a 60x water immersion objective (CFI60 Plan-Apo IR,  
189 1.27 NA, WD = 0.16 – 0.18 mm) and each frame was an average of 4 sweeps. Images of the  
190 biofilms formed stacks with 1  $\mu\text{m}$  vertical spacing and spanned a total depth of 35  $\mu\text{m}$ . For CLSM  
191 imaging of rhodamine-labelled CSP in biofilms of *gfp*-reporting *S. mutans*, a 488 nm excitation  
192 laser with a 525/25 green filter was used to collect green fluorescence images and the red  
193 fluorescence images were collected using a 561 nm excitation laser and a 595/50 nm filter.

194

## 195 **Image analysis**

196

197 To probe for structure in the spatial distribution of individual, *PcomX*-active cells in the  
198 biofilm we evaluated the nearest nighbor distance (NND) distribution (Dixon, 2013). The NND  
199 distribution  $f(r)dr$  is the probability that the distance  $r$  from a *PcomX*-active cell to its nearest  
200 *PcomX*-active neighbor lies in the interval  $r$  to  $r+dr$ . We found the distribution  $f(r)$  using a custom  
201 Matlab code that evaluates the nearest neighbor distances  $r$  within one layer of a confocal image  
202 stack. We then calculated the cumulative distribution function (CDF) of each NND,

203

$$204 \quad F(r) = \int_0^r dr' f(r') \quad (1)$$

205

206 which has the property  $F(r) \rightarrow 1$  at large  $r$ . The experimentally determined CDF can be compared  
207 to  $F_0(r)$ , which is the CDF that would occur if an equivalent number of cells were distributed across  
208 the image plane by a homogeneous Poisson process, which is often called complete spatial  
209 randomness (CSR). If a density  $n$  (cells/area) of cells is randomly (CSR) distributed over an area,  
210 the NND distribution is

211

$$212 \quad f_0(r)dr = 2n\pi \exp(-\pi nr^2)rdr \quad (2)$$

213



214 and the CDF is

215

$$216 \quad F_0(r) = 1 - \exp(-\pi nr^2) \quad (3)$$

217

218 This spatially random CDF must be modified slightly if most cells are randomly distributed, but a  
219 fraction  $p$  are within doublets, or pairs of cells in close proximity ( $r < r_c$ ). For this case we model  
220 the expected CDF as

221

$$222 \quad F_1(r) = p \frac{r^2}{r_c^2} + (1 - p)(1 - \exp(-\pi nr^2)) \quad (4.1)$$

223

224 for  $r < r_c$  and

225

$$226 \quad F_1(r) = p + (1 - p)(1 - \exp(-\pi nr^2)) \quad (4.2)$$

227

228 for  $r > r_c$ . Here  $r_c$  is the maximum separation between cells that comprise a doublet.

229 To assess whether the experimentally observed  $F(r)$  were consistent with the random  
230 model  $F_I(r)$ , we (1) fit the CDF obtained from an image showing  $N$  cells to Equation (4.1) and  
231 (4.2) to obtain the parameters ( $p$ ,  $n$ ,  $r_c$ ) for that image, (2) generated a Monte Carlo simulation of  
232  $N$  cells placed randomly according to those fit parameters, and (3) evaluated the envelope of CDFs  
233 from 1000 such simulations. This approach provides a Kolmogorov-Smirnov test of the agreement  
234 between the model CDF and the experimental CDF.

235 In order to assess the randomness of the spatial distribution of *PcomX* active cells on  
236 distance scales greater than the typical NND, we evaluated the Ripley's K metric for the  
237 distribution of inter-cellular distances (Ripley, 1976; Dixon, 2013). Ripley's K is widely used in  
238 spatial ecology as a test for clustering or dispersion of objects that are distributed in two-  
239 dimensions. We used a custom Matlab code to evaluate Ripley's K for the distances between  
240 *PcomX*-active cells within an image layer, using the buffer zone method to reduce edge artifacts  
241 (Ripley, 1976; Haase, 1995).

242

## 243 **RESULTS**

244

### 245 **CSP elicits heterogeneous *PcomX* activity in *S. mutans* biofilms in complex medium**

246

247 CSP elicits a bimodal (subpopulation-only) response from *S. mutans comX* in complex  
248 growth media such as BHI, whether cells are grown under uniform, microfluidic flow conditions  
249 (Son et al., 2012) or in a biofilm (Aspiras et al., 2004). We first confirmed that our confocal  
250 imaging could probe this bimodal response at the individual cell level.

251 Figure 1 shows two-color CLSM fluorescence images of biofilms of the dual reporting  
252 *PcomX-gfp/P23-rfp* strain growing in BHI medium. As described in *Methods*, biofilms were grown  
253 for 5 h in BHI and then incubated for 2 h in fresh medium that contained 1  $\mu$ M synthetic CSP



254 (Figures 1A, B), or no added CSP (Figures 1C, D), prior to a buffer wash and imaging. The  
255 constitutive red fluorescence of individual cells was strong whether CSP was provided or not,  
256 revealing the clustered morphology of the biofilms. Green fluorescence indicating *comX*  
257 expression was detected only in biofilms that were provided synthetic CSP: Figures 1A, B show  
258 *PcomX*-active cells as a small, mostly dispersed subpopulation of green cells. This is qualitatively  
259 consistent with the bimodal *comX* response to CSP observed in planktonic cultures, although we  
260 estimate the *comX*-active subpopulation in the biofilm at only 3-4%, much fewer than the 30-40%  
261 of cells that respond to CSP in planktonic conditions (Son et al., 2012; Fontaine et al., 2015).

262 Supplemental Figure 1 shows the two-color CLSM fluorescence images of biofilms of the  
263 non-reporting UA159 strain growing in the same conditions as *PcomX-gfp/P23-rfp* in Figure 1. As  
264 expected, Supplemental Figure S1 shows the absence of any fluorescence on the brightness scale  
265 of Figure 1, indicating that the red and green fluorescence in Figure 1 is due to the fluorescent  
266 reporters in the *PcomX-gfp/P23-rfp* strain rather than any background fluorescence.

267 Although Figures 1B and 1D show that the density of both red fluorescence and *PcomX*-  
268 active cells was greatest on the bottom (glass contact) layer of the biofilms, individual *comX*-  
269 expressing cells are visible throughout the depth of the biofilm and appear mostly well-separated.  
270 Figure 1E shows that roughly 10-20% of *comX*-active cells are paired into fluorescent doublets,  
271 where each doublet consists of two closely adjacent cells that are axially coaligned to form a bow-  
272 tie shape.

273

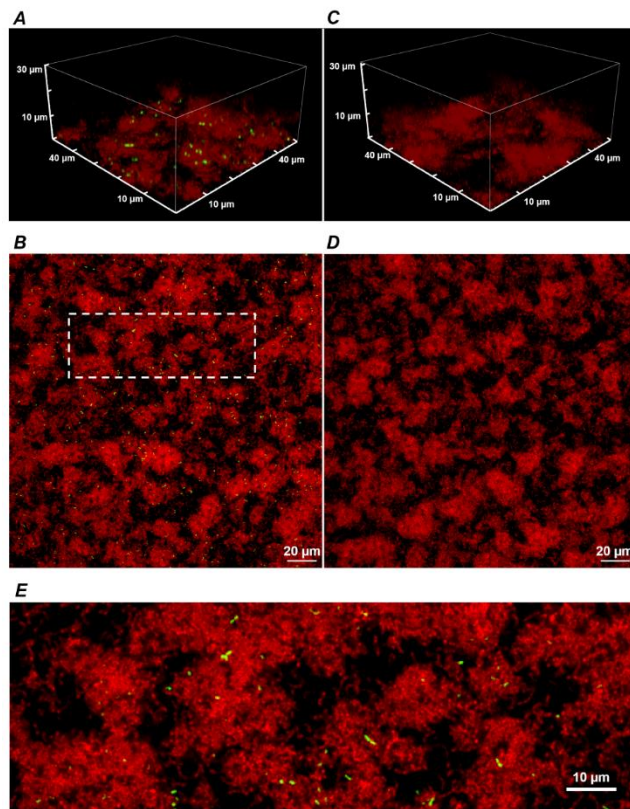

274  
275 **Figure 1:** A 3D confocal image stack (A) and the substrate layer image (B) of a biofilm of the dual  
276 reporting (*PcomX-gfp/P23-rfp*) strain grown for 5 hours before an additional 2-hour incubation in  
277 fresh BHI with 1  $\mu$ M synthetic CSP. Panels (C) and (D) show the same strain without addition of  
278 CSP; (E) An expanded view of the dotted region in (B). Data shown are representative of 3 separate  
279 image stacks collected for each condition.

280

### 281 **CSP diffuses rapidly through the biofilm**

282

283 We tested the permeability of an *S. mutans* biofilm to diffusion of CSP. We grew a  
284 constitutively reporting *Pldh-gfp* strain in BHI medium with 10 mM sucrose in a multiwell slide.  
285 After 5 h, the medium was exchanged for fresh BHI without sucrose and incubated for an  
286 additional 4 h. 1  $\mu$ M synthetic CSP, which was synthesized with an *N*-terminal label of rhodamine  
287 B (red) fluorophore, was then added to the different wells at different times. In this way the  
288 biofilms were supplied dye-labeled peptide for different time durations, ranging from 7 min to 4  
289 h, before the medium in all wells was exchanged for a phosphate buffer solution and the biofilms  
290 were imaged in CLSM.

291 The red fluorescence of the rhodamine B was seen to quickly concentrate in small pockets  
292 of elliptical shape, with length up to 2-3  $\mu$ m. The pockets are visible throughout the depth of the  
293 biofilm, even in the earliest images after 7 min of diffusion. Figures 2A and 2B show these pockets  
294 at the bottom (substrate) layer and 5  $\mu$ m above the bottom, respectively, of each biofilm. This  
295 pattern of fluorescence was unchanged after 4 h of diffusion. Interestingly we found no such

296 fluorescent pockets when soluble rhodamine B (no peptide) was added to the biofilm  
297 (Supplemental Figure S2), indicating that the pockets of red fluorescence were not due to  
298 rhodamine B binding a specific target such as eDNA (Islam et al., 2013). Analysis of the CLSM  
299 images (Supplemental Figures S3 and S4) shows that the red fluorescent pockets did not physically  
300 overlap with green fluorescence and therefore were not due to staining of live cells. Rather,  
301 imaging of planktonic cells incubated with rhodamine-B-CSP (Supplemental Figure S5) indicated  
302 that the CSP associates with certain noncellular material. Nevertheless, the rapid permeation of the  
303 rhodamine-CSP into the biofilm, with nearly immediate formation of a stable red fluorescence  
304 pattern, verified that CSP is mobile through the depth of the BHI-grown biofilm.  
305

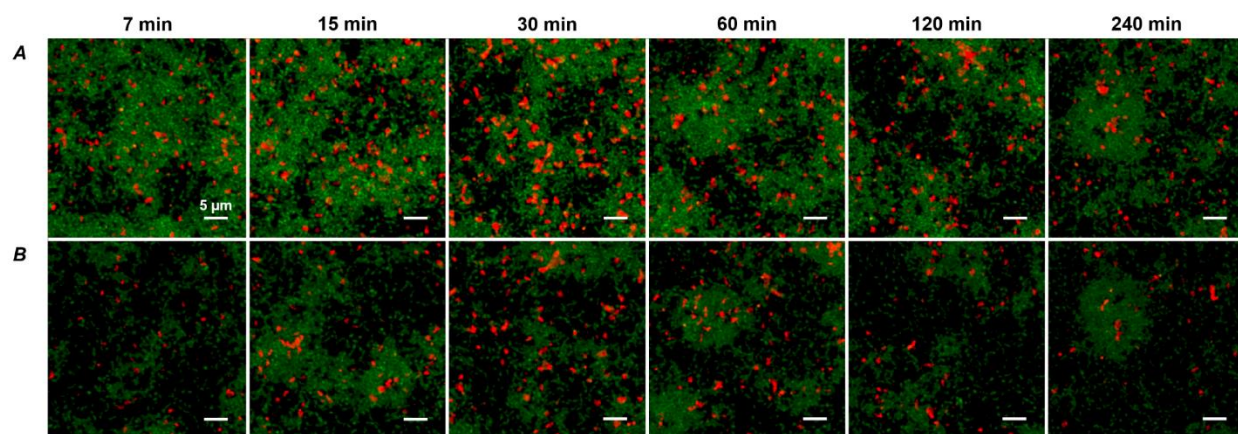

306  
307 **Figure 2:** (A) CLSM images of the substrate layer of a constitutive *gfp* reporting *S. mutans* strain  
308 grown for 5 h in BHI and then incubated (for the time intervals indicated) with 1  $\mu\text{M}$  rhodamine  
309 B labeled synthetic CSP. The green channel corresponds to the constitutive *gfp* reporter and the  
310 red channel shows rhodamine B fluorescence. The total intensity of the red fluorescence in the  
311 image reached its full value within 30 minutes of diffusion. (B) CLSM Images at the same *xy*  
312 locations as in (A) but 5  $\mu\text{m}$  above the substrate. Data shown are representative of 3 separate  
313 image stacks collected for each condition.  
314

### 315 ***ComX*-expressing cells within a 2D slice of biofilm tend towards a random distribution**

316

317 We used the distribution of near-neighbor distances (NNDs) as a test of spatial correlations  
318 between *PcomX*-active cells, which could indicate regions where competence behavior is localized  
319 (Dazzo et al., 2013), such as through restricted diffusion of the XIP intercellular signal (Kaspar et  
320 al., 2017). Figures 3A, C, E show the distribution  $f(r)$  of the NND values (distances between  
321 nearest neighbors, *Methods*) for *PcomX*-active cells in 2D cross-sections such as that of Figure 1B.  
322 The image in Figure 1B contains  $N = 492$  green cells; the red curve in Figure 3A shows the NND  
323 distribution  $f_0(r)$  that would be expected if 492 cells were distributed across the image plane with  
324 complete spatial randomness (CSR, *Methods*). Figure 3B shows  $F(r)$ , the cumulative distribution  
325 function (CDF) of the green fluorescent cells, with  $F_0(r)$  (red curve), which is the NND CDF for a  
326 random spatial distribution of 492 cells. Figures 3C-3F show similar analyses at layers further

327 from the substrate. In all cases the true NND distribution and CDF show an excess (relative to the  
 328 CSR model) at near-neighbor distances near 1-2  $\mu\text{m}$ . This deviation indicates that *comX*-active  
 329 cells have some tendency to collocate at this separation.

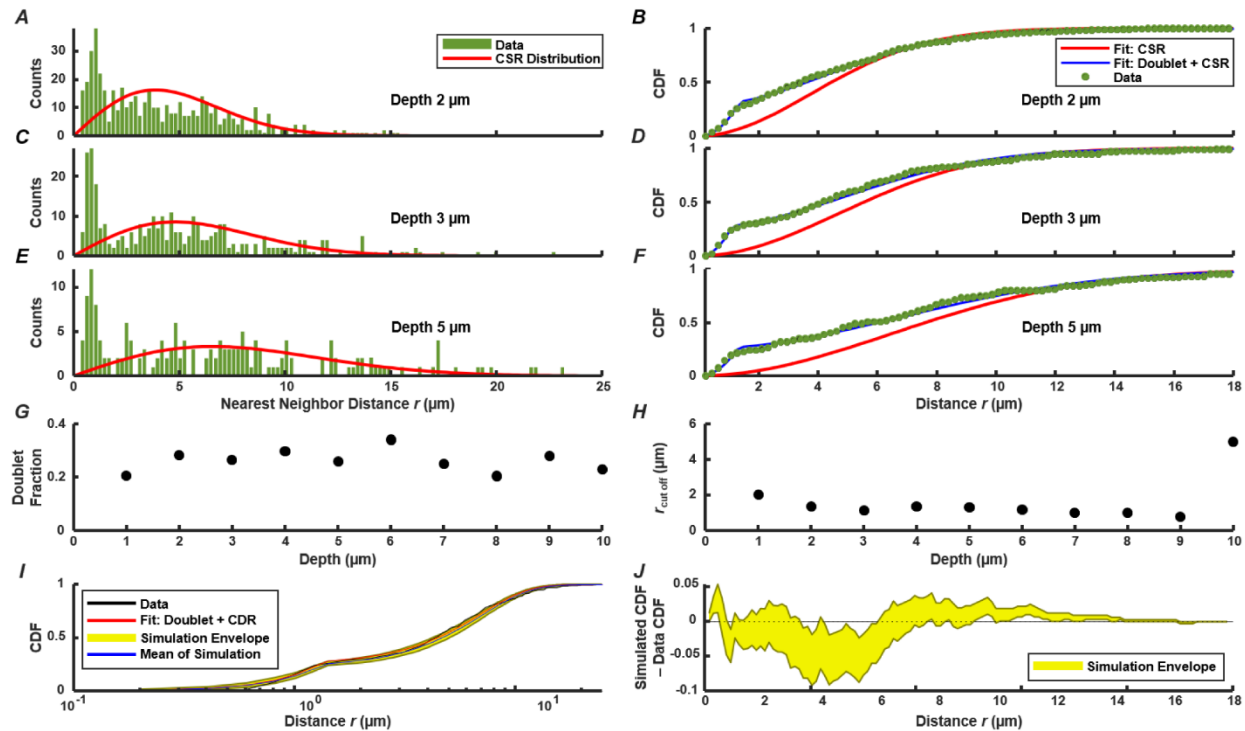

330  
 331 **Figure 3** – Distribution of nearest neighbor distances between *PcomX*-expressing cells in the  
 332 biofilm of Figure 1A, B following addition of CSP; (A) (C) (E) NND histogram  $f(r)$  (green) of  
 333 data, and theoretical  $f_0(r)$  (red) which corresponds to complete spatial randomness (CSR). Panels  
 334 (A), (C), (E) show  $f(r)$  and  $f_0(r)$  at depths of 2, 3, and 5  $\mu\text{m}$  respectively within the biofilm; (B)  
 335 (D) (F) Cumulative distribution function  $F(r)$  of data (green), and theoretical  $F_0(r)$  (red) which  
 336 corresponds to CSR. The theoretical  $F_1(r)$  (blue) for the doublet+random model is also shown in  
 337 (B) (D) (F) and was obtained from a fit of Equations (4.1) – (4.2) to the experimental  $F(r)$ ; (G)  
 338 (H) doublet fraction  $p$  and cutoff  $r_c$  obtained from fitting experimental CDF to Equations (4.1) –  
 339 (4.2) at different depths in the biofilm, from 1 to 10  $\mu\text{m}$  above the substrate layer. (I) Kolmogorov-  
 340 Smirnov test by Monte Carlo simulation of the doublet+random model: 1000 simulations were  
 341 performed of cells randomly distributed in two dimensions with the same total number and density  
 342 as observed in (C), using the fit parameters of  $F_1(r)$  found in (D). (J) The difference between the  
 343 experimental  $F(r)$  and the CDF obtained from the Monte Carlo simulations in (I). The yellow  
 344 envelope in (I) (J) represents the 90<sup>th</sup> and 10<sup>th</sup> percentiles from 1000 simulations.

345  
 346 The confocal images in Figure 1A, B suggest that the anomaly at short distances is a  
 347 consequence of the cell doublets – pairs of closely adjacent green fluorescent cells. As these  
 348 doublets have the appearance of sister cells that are not fully separated, we considered that they  
 349 are likely not due to competence-favoring microenvironments. Rather they correspond to partially  
 350 attached daughter cells that have inherited the same state of the *PcomX* bimodal switch (Hagen



351 and Son, 2017) from their parent cell. Supplementary Figure S6 shows that very similar fluorescent  
352 doublets are present after a well-stirred, planktonic culture is incubated with CSP. Therefore we  
353 compared our biofilm NND histograms and CDF to a slightly modified spatially random model  
354 (*Methods*). The model considers a density  $n$  of green fluorescent cells that are distributed randomly  
355 and homogeneously across the image, where a fraction  $p$  of these cells have by chance a sister cell  
356 within a short distance  $r < r_c$ .  $F_1(r)$  is the CDF for this model. It is given by Equations (4.1) and  
357 (4.2), where the cutoff distance  $r_c$  defines the maximum separation of cells within a doublet.

358 Figures 3B, 3D, 3F compare  $F(r)$  (the experimental CDF) with least-squares fits to the  
359 doublet model  $F_1(r)$ . The fit parameters  $r_c \approx 1.5$ - $2 \mu\text{m}$  and  $p \approx 0.2$ - $0.3$  are mostly consistent  
360 throughout the depth of the biofilm (Figures 3G and 3H). To assess the significance of any  
361 disagreement between the experimental CDF and the model we performed a Kolmogorov-Smirnov  
362 test, based on a Monte Carlo approach (*Methods*). Briefly, we simulated the random (with  
363 doublets) distribution of an equivalent number of points in a two-dimensional plane, using  
364 parameters  $n$ ,  $r_c$  and  $p$  obtained from fitting the experimental data. We then evaluated the CDFs  
365 for these simulated distributions and compared them to the experimental distribution. As shown  
366 by Figure 3I and 3J, the experimental CDF is found to lie within the 10-90% range of the 1000  
367 simulated CDFs. Overall the doublet model provides good agreement with the experimental NND  
368 distributions. (Small deviations between the data and Equations (4.1) - (4.2) at distances greater  
369 than  $\sim 10 \mu\text{m}$  likely result from finite image size.) The data are therefore consistent with the null  
370 hypothesis that, aside from a small number of attached sister cells, the spatial distribution of *comX*-  
371 expressing cells in the images lacks structure on length scales less than about 10-20  $\mu\text{m}$ .

372 To test for spatial correlations on longer length scales, extending beyond nearest *PcomX*-  
373 active neighbors, we applied a test based on Ripley's K (Ripley, 1976; Haase, 1995). We  
374 calculated, for each *PcomX*-active cell in an image, the number of other active cells that lie within  
375 a radius  $r$ .  $K(r)$  is the average (over all cells) of this number, divided by the mean area density of  
376 active cells. By comparing  $K(r)$  to the value expected for CSR (Kiskowski et al., 2009), spatial  
377 correlations on long length scales can be detected.

378 In order to remove the quadratic behavior of  $K(r)$  that is characteristic of CSR, the function  
379  $H(r)$  is often used (Haase, 1995; Hart et al., 2019):

380

$$381 \quad H(r) = \sqrt{\frac{K(r)}{\pi}} - r \quad (5)$$

382

383  $H(r) = 0$  indicates complete spatial randomness, while  $H(r) > 0$  indicates clustering on spatial scales  
384 up to  $r$ .

385 Figure 4A shows  $H(r)$  calculated for the 492 *PcomX*-expressing cells in the 2D layer of  
386 Figure 1B. The shaded region is the 90<sup>th</sup> and 10<sup>th</sup> percentile envelope from 1000 trials of simulated  
387  $H(r)$ , each obtained by evaluating  $H(r)$  for 492 points distributed randomly (CSR) over equivalent  
388 area. The short-range (sister cell) clustering that was detected in the NND analysis causes the  
389 experimental  $H(r)$  to exceed the envelope of the CSR simulations at distances near  $2 \mu\text{m}$ , and  $H(r)$

390 remains outside the CSR envelope up to distances near 20  $\mu\text{m}$ . Figure 4B shows that including the  
391 presence of active sister-cells in the simulation of randomly distributed cells improves the  
392 agreement between the experimental and simulated  $H(r)$ . However, some possible deviation of  
393  $H(r)$  from the doublet+random model is apparent at  $r = 10\text{-}20 \mu\text{m}$ .

394 We do anticipate some deviation of  $H(r)$  from CSR behavior on this length scale because  
395 the density of the EPS matrix and microcolony biomass itself varies on this scale (Xiao and Koo,  
396 2010). The locations of green fluorescent cells should generally correlate with the distinctly non-  
397 uniform pattern of constitutive red fluorescence in Figure 1. Therefore we calculated  $H(r)$  for  
398 simulations of a nearly-random spatial model in which (1) a density  $n$  of green fluorescent cells is  
399 distributed across the image, at locations randomly sampled according to a distribution that is  
400 weighted by the red fluorescent background in Figure 1B, and (2) a fraction  $p$  of the green  
401 fluorescent cells are part of a sister-cell doublet. This model places green fluorescent cells  
402 (including doublets) at random locations, but with a spatial weighting that matches the  
403 heterogeneous density of live cells in the biofilm.

404 Figure 4C compares the experimental  $H(r)$  with that obtained by simulations of this sister-  
405 cell + background-weighted model, generated using the  $r_c$ ,  $n$  and  $p$  parameters extracted above.  
406 The experimental  $H(r)$  falls within the 10-90% envelope of 1000 simulations of the model.  
407 Consequently the Ripley's analysis supports the null hypothesis that the distribution of *comX*-  
408 expressing cells is generally random and homogeneous, with the exception of sister-cell  
409 associations on a very short scale and the variations in the biofilm density on larger length scales.  
410 The data give no indication of clustering on scales of roughly 5-20  $\mu\text{m}$ , which might signify  
411 microenvironments favorable to *comX* activity.

412

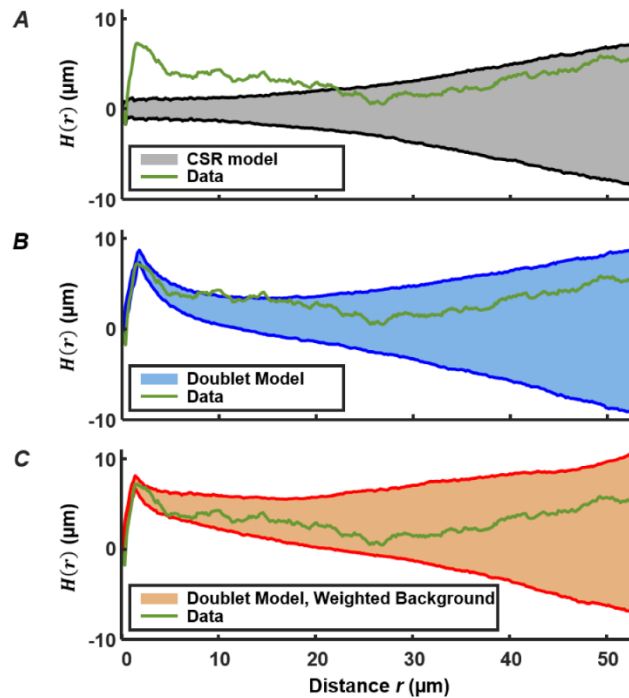

413  
414 **Figure 4:** Ripley's K analysis showing the  $H(r)$  (green curve) for the *comX*-active cells in the  
415 biofilm layer of Figure 1A and 1B. (A) Comparison of  $H(r)$  to the envelope of 1000 simulations  
416 (shaded region) of  $H(r)$  for 492 cells randomly distributed over the same area. The shading  
417 indicates the 10<sup>th</sup> and 90<sup>th</sup> percentiles of the simulated  $H(r)$ . (B) Comparison of  $H(r)$  to the envelope  
418 of simulations of 492 cells distributed by the doublet+random model; (C) Comparison of  $H(r)$  to  
419 the envelope of simulations of 492 cells distributed by the doublet+random model, where non-  
420 doublet cells are placed at random locations that are weighted according to the red fluorescent (live  
421 cell) background of Figure 1B.

422

#### 423 **Correlation between *PcomX* activity and CSP accumulation**

424

425 Although Figure 2 confirms that CSP permeates the depth of the biofilm, we investigated  
426 whether heterogeneity in CSP concentrations on short length scales could affect the spatial  
427 distribution of *PcomX* activity. We used Figure 2 to test whether *comX* active cells were more  
428 likely to lie in proximity to the sites of accumulated CSP revealed by the rhodamine-B label.

429 Figure 5A shows a confocal image of the substrate layer of a biofilm of the *PcomX-gfp*  
430 strain, grown in BHI with 10 mM sucrose for 5 h. Spent medium was exchanged for fresh BHI (no  
431 added sucrose) containing 1  $\mu\text{M}$  rhodamine-B labeled CSP, and the biofilm was then incubated  
432 for 2 h before washing and imaging. Figure 5B shows the histogram of distances from each *PcomX*-  
433 active cell to the nearest red fluorescent CSP site. Figure 5B also compares that distance histogram  
434 to that of a fully randomized distribution, wherein the same number of *PcomX*-active cells are  
435 placed at completely random locations with respect to the same set of red fluorescence sites. To  
436 make that comparison we performed 1000 simulation trials in which the *PcomX*-active cells in the  
437 image were randomly repositioned within the image field, and the histogram of distances to the



438 nearest red site recalculated; the gray envelope in the figure defines the 90<sup>th</sup> and 10<sup>th</sup> percentiles  
439 from these simulations. The histogram evaluated from the true locations of the *comX* active cells  
440 falls well within this random envelope, indicating the *comX*-expressing cells are not closer, on  
441 average, to the CSP-rich sites than would be expected from chance.

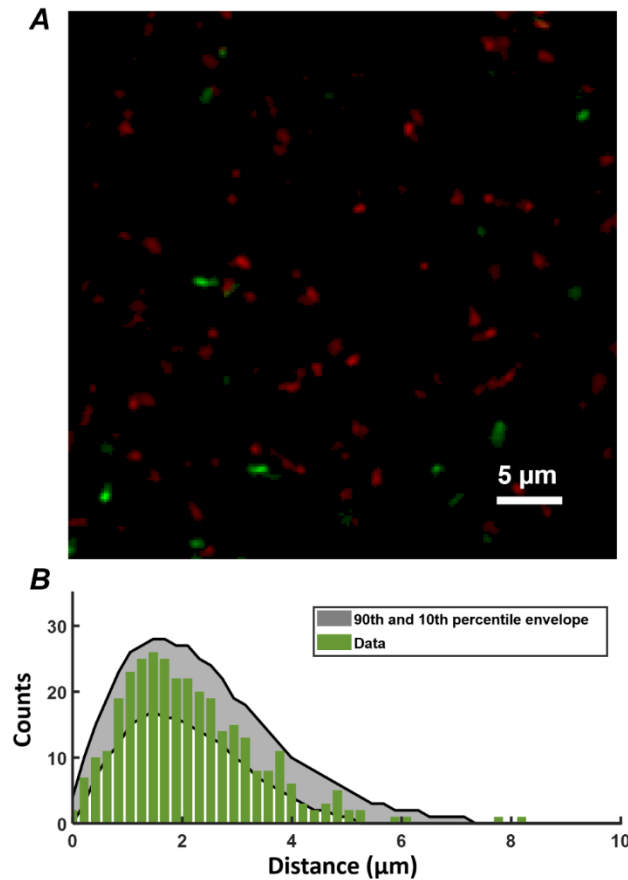

442  
443  
444 **Figure 5:** (A) Portion of the two-color image of the substrate layer of a *PcomX-gfp* (plasmid)  
445 biofilm grown for 5 h in BHI and incubated with 1 μM rhodamine-B (red) labeled CSP for 2 h;  
446 (B) Histogram (green bars) of distances from *PcomX*-active (green fluorescent) cells to the nearest  
447 rhodamine CSP-rich (red fluorescent) site; The gray envelope represents the 90<sup>th</sup> and 10<sup>th</sup>  
448 percentiles from 1000 simulations of the green-to-red nearest distance histogram after the *comX*-  
449 expressing cells have been randomly relocated throughout the image. Data shown are  
450 representative of 3 separate image stacks collected.

### 451 452 **Responsivity to XIP peptide in defined medium declines in aged biofilm**

453  
454 It was previously reported that, when *S. mutans* biofilms were grown in chemically defined  
455 medium for periods up to ~20 h, the ability of XIP to induce the (unimodal) *comX* response began  
456 to decline (Shields and Burne, 2016). We tested whether this response to XIP remains population-  
457 wide (unimodal), as it does for planktonic cells growing in chemically defined medium (Son et al.,

2012), or whether the *comX* response occurs within a subpopulation (Shields and Burne, 2016). We grew biofilms of the *PcomX-gfp* strain and a xylose-inducible control, *Pxyl-gfp*, in the defined medium FMC with 5 mM sucrose and 15 mM glucose for 5, 10 and 20 h. The medium was then exchanged with fresh FMC containing 500 nM synthetic XIP and 15 mM glucose for the *PcomX-gfp* biofilms, or 5 mM maltose and 6.66 mM xylose for the *Pxyl-gfp* biofilms. Biofilms were then incubated for 3 h and, immediately prior to two-photon imaging, all media were exchanged with phosphate buffer.

Figure 6A-F shows two-photon images of the green fluorescence of biofilms that were grown for 5, 10 or 20 h prior to induction by XIP or xylose. Rather than segmenting individual cells in the confocal image stacks, we characterized the variability in individual cell brightness by coarse-graining the images into cell-sized volumes. We aggregated the data into voxels of 4x4x1 pixels ( $0.83 \times 0.83 \times 1 \mu\text{m}^3 = 0.69 \mu\text{m}^3$ ) and generated histograms of the brightness of these binned voxels.

Both the *PcomX-gfp* (Figure 6A) and *Pxyl-gfp* (Figure 6D) biofilms show robust fluorescence at 5 h, significantly brighter than the uninduced controls (Supplemental Figure S7). The fluorescence of the *PcomX-gfp* is brighter but more heterogeneous than that of the *Pxyl-gfp*, although both histograms show unimodal (population wide) fluorescence. The fluorescence of the *PcomX-gfp* biofilm declines as the biofilm ages, while the *Pxyl-gfp* biofilm shows a more constant fluorescence histogram over time.

The XIP-induced images are qualitatively unlike the CSP-induced image of Figure 1B, in which isolated, brightly fluorescent cells are separated by substantial regions lacking *comX* activity. The *PcomX* response to XIP remains population-wide (unimodal), leading to histograms of GFP fluorescence in Figure 6G-6I that are broad, similar to an exponential distribution, but nevertheless single-peaked. These data indicate that even in the aging biofilm, the mobility of XIP is sufficient, and microenvironments are sufficiently accommodating to competence gene expression, to activate *comX* throughout the biofilm, giving an overall response that is similar to that observed in well-mixed, planktonic cultures.

We note that the *PcomX* response to XIP can appear bimodal if the histograms are constructed using a logarithmic fluorescence scale. Supplemental Figure S8 shows that with logarithmic binning, the fluorescence histograms for both the *PcomX* and the *Pxyl* reporter strains acquire a two-humped character. However, this shape is due to logarithmic binning of a near-exponential distribution; it is not an indicator of bimodal gene expression.

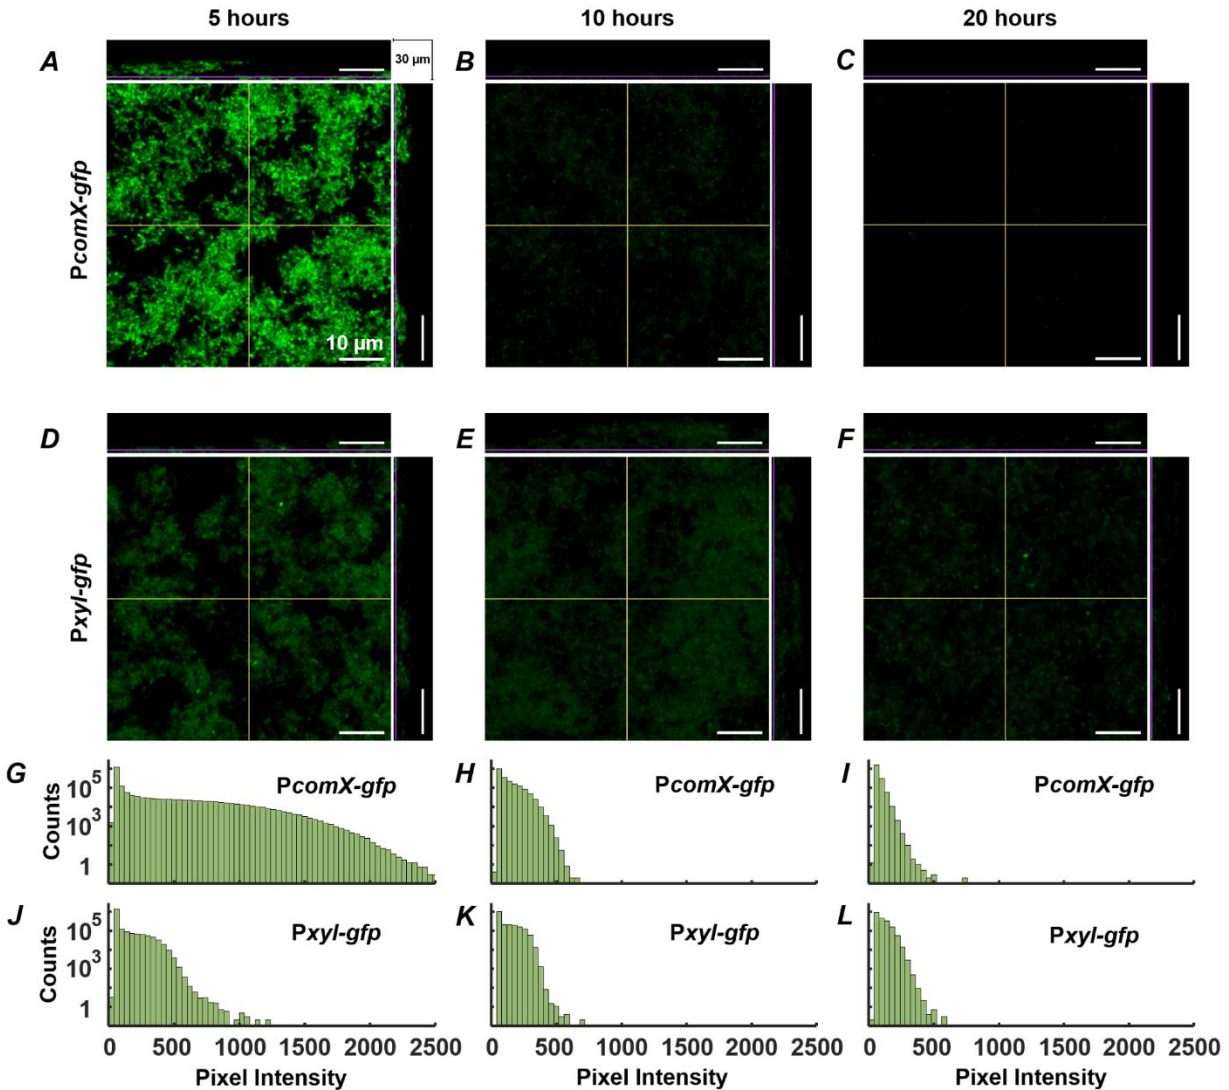

490

491 **Figure 6:** Activation of *PcomX-gfp* (plasmid) grown in FMC media for (A) 5, (B) 10 and (C) 20  
 492 h before being incubated with 500 nm XIP for an additional 3 h. A *Pxyl-gfp* strain induced with  
 493 xylose (at the same time as XIP was added for *PcomX-gfp*) grown in FMC media for (D) 5, (E) 10  
 494 and (F) 20 h under the same conditions as (A)-(C); (G)-(L) Brightness intensity histograms of 16  
 495 pixels at a time throughout the depth of the biofilms in (A)-(F) respectively. All images were  
 496 obtained by two-photon microscopy with 920 nm excitation wavelength and a 525/25 green filter.  
 497 The middle panel in each multiphoton image shows the 2D *x-y* plane. The depth (*z*) of this plane  
 498 within the biofilm is represented by the purple lines on the adjacent top and side panels which  
 499 show the *x-z* and *y-z* planes respectively. The *x* and *y* regions of the adjacent planes are represented  
 500 by the yellow lines on the 2D, *x-y* plane. The total stack depth is 30 μm. The brightness scale runs  
 501 from 0 to 2500 fluorescence units in (A)-(C) and 0 to 1500 in (D)-(F). Data shown are  
 502 representative of 3 separate image stacks collected for each condition.

503

504 **DISCUSSION**

505

506 The response of *S. mutans comX* to the exogenous signals XIP and CSP is complex, even  
507 when cells are grown in precisely defined, microfluidic conditions (Hagen and Son, 2017). Here  
508 we have used confocal microscopy to characterize how heterogeneity in competence gene  
509 expression, and particularly the bimodal response of *comX* to the CSP signal, is affected the biofilm  
510 environment.

511 Confocal microscopy has been invaluable for probing the structure of the EPS matrix and  
512 the organization of microcolonies in *S. mutans* biofilms (Xiao and Koo, 2010), and for exploring  
513 spatial positioning or spatial ecology of *S. mutans* within mixed species biofilms (Nakanishi et al.,  
514 2018; Kim et al., 2020). Imaging has shown that cell vitality, respiratory activity and EPS  
515 production are distributed nonuniformly in *S. mutans* biofilms (Decker et al., 2014). Several  
516 studies have explored competence behavior in biofilms through the imaging of fluorescent gene-  
517 reporter strains (Aspiras et al., 2004; Shields and Burne, 2016; Kaspar et al., 2017). Aspiras *et al.*  
518 found that green fluorescence in a biofilm of a *PcomX-gfp* reporting strain was sparsely expressed  
519 following addition of exogenous CSP, with fewer than 1% of cells responding to the stimulus  
520 (Aspiras et al., 2004). As both the ComCDE and ComRS elements of the competence pathway  
521 have been described as quorum sensing systems, the sparse response of *comX* could imply that  
522 restricted diffusion or other local effects in the biofilm modulate expression of the competence  
523 genes (Aspiras et al., 2004; Kaspar et al., 2017). The increase of EPS in response to elevated  
524 sucrose, for example, could impact the diffusion of XIP within the *S. mutans* biofilm (Klein et al.,  
525 2009; Xiao and Koo, 2010; Kaspar et al., 2017). Aspiras *et al.* suggested that *comX* expression  
526 may be localized to small clusters of cells, occupying discrete microniches that provide favorable  
527 conditions of cell density, nutrient and other factors. Modeling studies have also anticipated spatial  
528 correlations or clustering in quorum activity inside bacterial biofilms (Hense et al., 2007; Kindler  
529 et al., 2019).

530 Diffusion in biofilms is affected by molecular charge and mass, interactions with biofilm  
531 constituents, and by the porosity of the biofilm (Stewart, 2003; Marcotte et al., 2004; Zhang et al.,  
532 2011). High molecular weight solutes such as dextrans and PEG were found to diffuse through *S.*  
533 *mutans* biofilms at half their free (aqueous solution) rate (Zhang et al., 2011), with lower mobility  
534 at the base of the biofilm (Marcotte et al., 2004). Uncharged fluorophores like rhodamine B were  
535 found to diffuse more slowly than charged fluorophores. However, reductions in diffusion  
536 coefficients were generally not large. Although our data suggest that rhodamine B – CSP interacts  
537 with a constituent of the matrix, the diffusion coefficient  $D = 1.8 \times 10^{-6} \text{ cm}^2/\text{s}$  of rhodamine B in *S.*  
538 *mutans* biofilms was measured at 40% of its value in water, indicating that the biofilm will not  
539 dramatically slow the kinetics of equilibration (Zhang et al., 2011). In biofilms of *S. oralis* and *S.*  
540 *gordonii*, even large (40-70 kDa) dextrans penetrated 100  $\mu\text{m}$  cell clusters within roughly 1-2 min  
541 (Takenaka et al., 2009).

542 The above studies predict that the biofilm matrix may have a modest effect on the diffusion  
543 of the XIP and CSP peptides. Our data are consistent with that expectation. Although the  
544 rhodamine B labeled CSP appeared to concentrate in discrete locations, these locations formed

545 rapidly throughout the depth of the biofilm. In the resulting equilibrium, *PcomX*-active cells were  
546 not more likely to be near the CSP-rich locations than elsewhere in the biofilm, indicating that  
547 their *comX* activity was not triggered by localized high concentrations of CSP. Exogenously-added  
548 XIP also appeared to diffuse readily through the biofilms.

549 Consequently, the spatial distribution of *comX* activity suggests that restricted diffusion  
550 does not lead to the formation of clusters or microniches of competence gene expression. The  
551 spatial distribution of active cells provides insight into whether other favorable conditions such as  
552 pH, nutrient, or other conditions lead to clustering of competence behavior. Dazzo *et al.*  
553 demonstrated that statistical methods such as Ripley's K and the NND distribution (Dazzo, 2012;  
554 Dazzo et al., 2013) provide a quantitative and statistically rigorous alternative to methods based  
555 on sender/receiver fluorescent reporter constructs (Gantner et al., 2006; Kaspar et al., 2017), and  
556 that these statistical tools can be far more sensitive than simple visual inspection of biofilm images.  
557 They can identify positive or negative spatial correlations, indicative of cell-to-cell  
558 communication. The NND can readily distinguish aggregation from CSR (Dazzo, 2012), while  
559 Ripley's K revealed the presence of two types of local interactions in a biofilm, with length scales  
560 of 6-8  $\mu\text{m}$  and 36  $\mu\text{m}$  respectively (Dazzo et al., 2013).

561 The NND for *PcomX*-activity (in response to CSP) was consistent with a simple model in  
562 which roughly 80% of *comX*-expressing cells are distributed with spatial randomness – more  
563 precisely a homogeneous Poisson process. The remaining 20% of cells are closely proximal to and  
564 physically aligned with cells in the first group, indicative of sister cell doublets that have inherited  
565 the same state (*ON* or *OFF*) of the *comX* bimodal switch from their parent cell. The excellent  
566 agreement between the observed NND distribution and the theoretical distribution for this model  
567 supports the null hypothesis that *comX* expression is not significantly clustered into niches or  
568 islands. Alternatively, if such niches exist, they are small enough that they comprise at most a  
569 solitary cell (or doublet). Although the Ripley's K analysis indicates some deviations from pure  
570 spatial randomness, these effects appear attributable to the correlations between sister-cells and  
571 the microcolony morphology of the biofilm itself.

572 Nevertheless it is interesting that the fraction of cells activating in the biofilm – not more  
573 than a few percent - is much smaller than under planktonic conditions. If in the biofilm CSP  
574 activated *comX* at the same 30% average rate that is typical of planktonic conditions, the average  
575 distance between active cells in the biofilm would have been much smaller in our study. We would  
576 then have been able to detect spatial variations in that density, and possibly identify  
577 microenvironments in which that activation rate differed from the average. The fact that activation  
578 was closer to 1%, which is too sparse to allow any such analysis, suggests that conditions  
579 throughout the biofilm are generally unfavorable. Local conditions such as pH could bias the *comX*  
580 bimodal switch to the extent that very few cells are able to accumulate enough intracellular ComS  
581 to activate the transition from *comX OFF* to *ON*. In this case the competence microniches consist  
582 of rare locations where one cell (or a doublet) is able to activate. To test this possibility it may be  
583 useful in future studies to apply spatially resolved probes of key environmental inputs such as pH  
584 and nutrient condition and correlate these with *comX* activity.



585  
586  
587  
588  
589  
590  
591  
592  
593  
594  
595  
596  
597  
598  
599  
600  
601  
602  
603  
604  
605  
606  
607  
608  
609  
610

## **ACKNOWLEDGMENTS**

The authors acknowledge microscopy assistance provided by Doug Smith of the UF Cell and Tissue Analysis Core, as well as discussions with Prof. Robert A. Burne and Dr. Robert C. Shields.

## **AUTHOR CONTRIBUTIONS**

II designed and performed experiments, analyzed and interpreted data and wrote the manuscript, SH designed experiments, analyzed and interpreted data, and wrote the manuscript. JK interpreted data, constructed bacterial strains and edited the manuscript. All authors gave final approval to the manuscript and agree to be accountable for all aspects of the work.

## **FUNDING**

Funding support was provided under award 1R01DE023339 from the National Institute of Dental and Craniofacial Research. Confocal microscopy was supported by the NIH Shared Instrumentation grant 1S10OD020026 to University of Florida (Dr. Habibeh Khoshbouei).

## **CONFLICT OF INTEREST STATEMENT**

The authors declare no conflicts of interest.

611 **REFERENCES**

- 612
- 613 Ahn, S.-J., and Burne, R. A. (2007). Effects of Oxygen on Biofilm Formation and the Atla  
614 Autolysin of *Streptococcus mutans*. *J. Bacteriol.* 189, 6293–6302. doi:10.1128/JB.00546-  
615 07.
- 616 Ahn, S.-J., Lemos, J. A. C., and Burne, R. A. (2005). Role of HtrA in Growth and Competence  
617 of *Streptococcus mutans* UA159. *J. Bacteriol.* 187, 3028–3038. doi:10.1128/JB.187.9.3028-  
618 3038.2005.
- 619 Ahn, S.-J., Wen, Z. T., and Burne, R. A. (2006). Multilevel Control of Competence Development  
620 and Stress Tolerance in *Streptococcus mutans* UA159. *Infect. Immun.* 74, 1631–1642.  
621 doi:10.1128/IAI.74.3.1631-1642.2006.
- 622 Aspiras, M., Ellen, R., and Cvitkovitch, D. (2004). ComX activity of *Streptococcus mutans*  
623 growing in biofilms. *FEMS Microbiol. Lett.* 238, 167–174. doi:10.1111/j.1574-  
624 6968.2004.tb09752.x.
- 625 Bowen, W. H., Burne, R. A., Wu, H., and Koo, H. (2018). Oral Biofilms: Pathogens, Matrix, and  
626 Polymicrobial Interactions in Microenvironments. *Trends Microbiol.* 26.  
627 doi:10.1016/j.tim.2017.09.008.
- 628 Branda, S. S., Vik, Å., Friedman, L., and Kolter, R. (2005). Biofilms: the matrix revisited.  
629 *Trends Microbiol.* 13, 20–26. doi:10.1016/j.tim.2004.11.006.
- 630 Cvitkovitch, D. G. (2001). Genetic Competence and Transformation in Oral Streptococci. *Crit.*  
631 *Rev. Oral Biol. Med.* 12, 217–243. doi:10.1177/10454411010120030201.
- 632 Dazzo, F. B. (2012). CMEIAS-Aided Microscopy of the Spatial Ecology of Individual Bacterial  
633 Interactions Involving Cell-to-Cell Communication within Biofilms. *Sensors* 12, 7047–  
634 7062. doi:10.3390/s120607047.
- 635 Dazzo, F., Klemmer, K., Chandler, R., and Yanni, Y. (2013). *In Situ* Ecophysiology of Microbial  
636 Biofilm Communities Analyzed by CMEIAS Computer-Assisted Microscopy at Single-Cell  
637 Resolution. *Diversity* 5, 426–460. doi:10.3390/d5030426.
- 638 De Furio, M., Ahn, S. J., Burne, R. A., and Hagen, S. J. (2017). Oxidative Stressors Modify the  
639 Response of *Streptococcus mutans* to Its Competence Signal Peptides. *Appl. Environ.*  
640 *Microbiol.* 83. doi:10.1128/AEM.01345-17.
- 641 Decho, A. W., Norman, R. S., and Visscher, P. T. (2010). Quorum sensing in natural  
642 environments: emerging views from microbial mats. *Trends Microbiol.* 18, 73–80.  
643 doi:10.1016/j.tim.2009.12.008.
- 644 Decker, E.-M., Klein, C., Schwindt, D., and von Ohle, C. (2014). Metabolic activity of  
645 *Streptococcus mutans* biofilms and gene expression during exposure to xylitol and sucrose.  
646 *Int. J. Oral Sci.* 6, 195–204. doi:10.1038/ijos.2014.38.
- 647 Dixon, P. M. (2013). “Nearest Neighbor Methods Based in part on the article ‘Nearest neighbor  
648 methods,’” in *Encyclopedia of Environmetrics* doi:10.1002/9780470057339.van007.pub2.
- 649 Ferrell, J. E. (2002). Self-perpetuating states in signal transduction: positive feedback, double-  
650 negative feedback and bistability. *Curr. Opin. Cell Biol.* 14, 140–148. doi:10.1016/S0955-  
651 0674(02)00314-9.



- 652 Fontaine, L., Wahl, A., Fléchar, M., Mignolet, J., and Hols, P. (2015). Regulation of  
653 competence for natural transformation in streptococci. *Infect. Genet. Evol.* 33, 343–360.  
654 doi:10.1016/j.meegid.2014.09.010.
- 655 Gantner, S., Schmid, M., Dürr, C., Schuegger, R., Steidle, A., Hutzler, P., et al. (2006). *In situ*  
656 quantitation of the spatial scale of calling distances and population density-independent N-  
657 acylhomoserine lactone-mediated communication by rhizobacteria colonized on plant roots.  
658 *FEMS Microbiol. Ecol.* 56, 188–194. doi:10.1111/j.1574-6941.2005.00037.x.
- 659 Guo, L., Hu, W., He, X., Lux, R., McLean, J., and Shi, W. (2013). Investigating Acid Production  
660 by *Streptococcus mutans* with a Surface-Displayed pH-Sensitive Green Fluorescent Protein.  
661 *PLoS One* 8, e57182. doi:10.1371/journal.pone.0057182.
- 662 Guo, Q., Ahn, S.-J., Kaspar, J., Zhou, X., and Burne, R. A. (2014). Growth Phase and pH  
663 Influence Peptide Signaling for Competence Development in *Streptococcus mutans*. *J.*  
664 *Bacteriol.* 196, 227–236. doi:10.1128/JB.00995-13.
- 665 Haase, P. (1995). Spatial pattern analysis in ecology based on Ripley’s K-function: Introduction  
666 and methods of edge correction. *J. Veg. Sci.* 6, 575–582. doi:10.2307/3236356.
- 667 Hagen, S. J., and Son, M. (2017). Origins of heterogeneity in *Streptococcus mutans* competence:  
668 interpreting an environment-sensitive signaling pathway. *Phys. Biol.* 14, 015001.  
669 doi:10.1088/1478-3975/aa546c.
- 670 Hart, J. W., Waigh, T. A., Lu, J. R., and Roberts, I. S. (2019). Microrheology and Spatial  
671 Heterogeneity of *Staphylococcus aureus* Biofilms Modulated by Hydrodynamic Shear and  
672 Biofilm-Degrading Enzymes. *Langmuir* 35, 3553–3561. doi:10.1021/acs.langmuir.8b04252.
- 673 Hense, B. A., Kuttler, C., Müller, J., Rothballer, M., Hartmann, A., and Kreft, J.-U. (2007). Does  
674 efficiency sensing unify diffusion and quorum sensing? *Nat. Rev. Microbiol.* 5, 230–239.  
675 doi:10.1038/nrmicro1600.
- 676 Hunter, R. C., and Beveridge, T. J. (2005). Application of a pH-Sensitive Fluoroprobe (C-  
677 SNARF-4) for pH Microenvironment Analysis in *Pseudomonas aeruginosa* Biofilms. *Appl.*  
678 *Environ. Microbiol.* 71, 2501–2510. doi:10.1128/AEM.71.5.2501-2510.2005.
- 679 Ishkov, I. P., Ahn, S.-J., Rice, K. C., and Hagen, S. J. (2020). Environmental Triggers of *lrgA*  
680 Expression in *Streptococcus mutans*. *Front. Microbiol.* 11. doi:10.3389/fmicb.2020.00018.
- 681 Islam, M. M., Chakraborty, M., Pandya, P., Al Masum, A., Gupta, N., and Mukhopadhyay, S.  
682 (2013). Binding of DNA with Rhodamine B: Spectroscopic and molecular modeling  
683 studies. *Dye. Pigment.* 99, 412–422. doi:10.1016/j.dyepig.2013.05.028.
- 684 Kaspar, J., Underhill, S. A. M., Shields, R. C., Reyes, A., Rosenzweig, S., Hagen, S. J., et al.  
685 (2017). Intercellular Communication via the *comX*-Inducing Peptide (XIP) of *Streptococcus*  
686 *mutans*. *J. Bacteriol.* 199. doi:10.1128/JB.00404-17.
- 687 Kim, D., Barraza, J. P., Arthur, R. A., Hara, A., Lewis, K., Liu, Y., et al. (2020). Spatial mapping  
688 of polymicrobial communities reveals a precise biogeography associated with human dental  
689 caries. *Proc. Natl. Acad. Sci.* 117. doi:10.1073/pnas.1919099117.
- 690 Kindler, O., Pulkkinen, O., Cherstvy, A. G., and Metzler, R. (2019). Burst statistics in an early  
691 biofilm quorum sensing model: the role of spatial colony-growth heterogeneity. *Sci. Rep.* 9,  
692 12077. doi:10.1038/s41598-019-48525-2.

- 693 Kiskowski, M. A., Hancock, J. F., and Kenworthy, A. K. (2009). On the Use of Ripley's K-  
694 Function and Its Derivatives to Analyze Domain Size. *Biophys. J.* 97, 1095–1103.  
695 doi:10.1016/j.bpj.2009.05.039.
- 696 Klein, M. I., Duarte, S., Xiao, J., Mitra, S., Foster, T. H., and Koo, H. (2009). Structural and  
697 Molecular Basis of the Role of Starch and Sucrose in *Streptococcus mutans* Biofilm  
698 Development. *Appl. Environ. Microbiol.* 75, 837–841. doi:10.1128/AEM.01299-08.
- 699 Koo, H., Falsetta, M. L., and Klein, M. I. (2013). The Exopolysaccharide Matrix. *J. Dent. Res.*  
700 92, 1065–1073. doi:10.1177/0022034513504218.
- 701 Kreth, J., Hagerman, E., Tam, K., Merritt, J., Wong, D. T. W., Wu, B. M., et al. (2004).  
702 Quantitative analyses of *Streptococcus mutans* biofilms with quartz crystal microbalance,  
703 microjet impingement and confocal microscopy. *Biofilms* 1, 277–284.  
704 doi:10.1017/S1479050504001516.
- 705 Kreth, J., Merritt, J., Zhu, L., Shi, W., and Qi, F. (2006). Cell density- and ComE-dependent  
706 expression of a group of mutacin and mutacin-like genes in *Streptococcus mutans*. *FEMS*  
707 *Microbiol. Lett.* 265, 11–17. doi:10.1111/j.1574-6968.2006.00459.x.
- 708 Leme, A. F. P., Koo, H., Bellato, C. M., Bedi, G., and Cury, J. A. (2006). The Role of Sucrose in  
709 Cariogenic Dental Biofilm Formation—New Insight. *J. Dent. Res.* 85, 878–887.  
710 doi:10.1177/154405910608501002.
- 711 Loesche, W. J. (1986). Role of *Streptococcus mutans* in human dental decay. *Microbiol. Rev.* 50,  
712 353–380.
- 713 Marcotte, L., Therien-Aubin, H., Sandt, C., Barbeau, J., and Lafleur, M. (2004). Solute Size  
714 Effects on the Diffusion in Biofilms of *Streptococcus mutans*. *Biofouling* 20, 189–201.  
715 doi:10.1080/08927010400010494.
- 716 Mashburn-Warren, L., Morrison, D. A., and Federle, M. J. (2010). A novel double-tryptophan  
717 peptide pheromone controls competence in *Streptococcus* spp. via an Rgg regulator. *Mol.*  
718 *Microbiol.* 78, 589–606. doi:10.1111/j.1365-2958.2010.07361.x.
- 719 Moye, Z. D., Son, M., Rosa-Alberty, A. E., Zeng, L., Ahn, S.-J., Hagen, S. J., et al. (2016).  
720 Effects of Carbohydrate Source on Genetic Competence in *Streptococcus mutans*. *Appl.*  
721 *Environ. Microbiol.* 82, 4821–4834. doi:10.1128/AEM.01205-16.
- 722 Nakanishi, Y., Yamamoto, T., Obana, N., Toyofuku, M., Nomura, N., and Kaneko, A. (2018).  
723 Spatial Distribution and Chemical Tolerance of *Streptococcus mutans* within Dual-Species  
724 Cariogenic Biofilms. *Microbes Environ.* 33. doi:10.1264/jsme2.ME18113.
- 725 Parsek, M. R., and Greenberg, E. P. (2005). Sociomicrobiology: the connections between  
726 quorum sensing and biofilms. *Trends Microbiol.* 13, 27–33. doi:10.1016/j.tim.2004.11.007.
- 727 Qi, F., Merritt, J., Lux, R., and Shi, W. (2004). Inactivation of the *ciaH* Gene in *Streptococcus*  
728 *mutans* Diminishes Mutacin Production and Competence Development, Alters Sucrose-  
729 Dependent Biofilm Formation, and Reduces Stress Tolerance. *Infect. Immun.* 72, 4895–  
730 4899. doi:10.1128/IAI.72.8.4895-4899.2004.
- 731 Ripley, B. D. (1976). The second-order analysis of stationary point processes. *J. Appl. Probab.*  
732 13, 255–266. doi:10.2307/3212829.
- 733 Senadheera, D. B., Cordova, M., Ayala, E. A., Chavez de Paz, L. E., Singh, K., Downey, J. S., et

- 734 al. (2012). Regulation of Bacteriocin Production and Cell Death by the VicRK Signaling  
735 System in *Streptococcus mutans*. *J. Bacteriol.* 194, 1307–1316. doi:10.1128/JB.06071-11.
- 736 Senadheera, M. D., Guggenheim, B., Spatafora, G. A., Huang, Y.-C. C., Choi, J., Hung, D. C. I.,  
737 et al. (2005). A VicRK Signal Transduction System in *Streptococcus mutans* Affects  
738 *gtfBCD*, *gbpB*, and *ftf* Expression, Biofilm Formation, and Genetic Competence  
739 Development. *J. Bacteriol.* 187, 4064–4076. doi:10.1128/JB.187.12.4064-4076.2005.
- 740 Shanker, E., and Federle, M. (2017). Quorum Sensing Regulation of Competence and  
741 Bacteriocins in *Streptococcus pneumoniae* and *mutans*. *Genes (Basel)*. 8, 15.  
742 doi:10.3390/genes8010015.
- 743 Shields, R. C., and Burne, R. A. (2016). Growth of *Streptococcus mutans* in Biofilms Alters  
744 Peptide Signaling at the Sub-population Level. *Front. Microbiol.* 7.  
745 doi:10.3389/fmicb.2016.01075.
- 746 Shields, R. C., Kaspar, J. R., Lee, K., Underhill, S. A. M., and Burne, R. A. (2019). Fluorescence  
747 Tools Adapted for Real-Time Monitoring of the Behaviors of *Streptococcus* Species. *Appl.*  
748 *Environ. Microbiol.* 85. doi:10.1128/AEM.00620-19.
- 749 Son, M., Ahn, S.-J., Guo, Q., Burne, R. A., and Hagen, S. J. (2012). Microfluidic study of  
750 competence regulation in *Streptococcus mutans* : environmental inputs modulate bimodal  
751 and unimodal expression of *comX*. *Mol. Microbiol.* 86, 258–272. doi:10.1111/j.1365-  
752 2958.2012.08187.x.
- 753 Son, M., Kaspar, J., Ahn, S. J., Burne, R. A., and Hagen, S. J. (2018). Threshold regulation and  
754 stochasticity from the MecA/ClpCP proteolytic system in *Streptococcus mutans*  
755 competence. *Mol. Microbiol.* 110, 914–930. doi:10.1111/mmi.13992.
- 756 Son, M., Shields, R. C., Ahn, S.-J., Burne, R. A., and Hagen, S. J. (2015). Bidirectional signaling  
757 in the competence regulatory pathway of *Streptococcus mutans*. *FEMS Microbiol. Lett.* 362,  
758 fnv159. doi:10.1093/femsle/fnv159.
- 759 Stewart, P. S. (2003). Diffusion in Biofilms. *J. Bacteriol.* 185, 1485–1491.  
760 doi:10.1128/JB.185.5.1485-1491.2003.
- 761 Stewart, P. S., and Franklin, M. J. (2008). Physiological heterogeneity in biofilms. *Nat. Rev.*  
762 *Microbiol.* 6, 199–210. doi:10.1038/nrmicro1838.
- 763 Takahashi, N., and Nyvad, B. (2011). The Role of Bacteria in the Caries Process. *J. Dent. Res.*  
764 90, 294–303. doi:10.1177/0022034510379602.
- 765 Takenaka, S., Pitts, B., Trivedi, H. M., and Stewart, P. S. (2009). Diffusion of Macromolecules  
766 in Model Oral Biofilms. *Appl. Environ. Microbiol.* 75, 1750–1753.  
767 doi:10.1128/AEM.02279-08.
- 768 Terleckyj, B., Willett, N. P., and Shockman, G. D. (1975). Growth of several cariogenic strains  
769 of oral streptococci in a chemically defined medium. *Infect. Immun.* 11, 649–655.  
770 doi:10.1128/IAI.11.4.649-655.1975.
- 771 Underhill, S. A. M., Shields, R. C., Burne, R. A., and Hagen, S. J. (2019). Carbohydrate and  
772 PepO control bimodality in competence development by *Streptococcus mutans*. *Mol.*  
773 *Microbiol.* 112, 1388–1402. doi:10.1111/mmi.14367.
- 774 van der Ploeg, J. R. (2005). Regulation of Bacteriocin Production in *Streptococcus mutans* by the

- 775 Quorum-Sensing System Required for Development of Genetic Competence. *J. Bacteriol.*  
776 187, 3980–3989. doi:10.1128/JB.187.12.3980-3989.2005.
- 777 Watnick, P., and Kolter, R. (2000). Biofilm, City of Microbes. *J. Bacteriol.* 182, 2675–2679.  
778 doi:10.1128/JB.182.10.2675-2679.2000.
- 779 Welin-Neilands, J., and Svensäter, G. (2007). Acid Tolerance of Biofilm Cells of *Streptococcus*  
780 *mutans*. *Appl. Environ. Microbiol.* 73, 5633–5638. doi:10.1128/AEM.01049-07.
- 781 Xiao, J., and Koo, H. (2010). Structural organization and dynamics of exopolysaccharide matrix  
782 and microcolonies formation by *Streptococcus mutans* in biofilms. *J. Appl. Microbiol.*  
783 doi:10.1111/j.1365-2672.2009.04616.x.
- 784 Yoshida, A., and Kuramitsu, H. K. (2002). Multiple *Streptococcus mutans* Genes Are Involved  
785 in Biofilm Formation. *Appl. Environ. Microbiol.* 68, 6283–6291.  
786 doi:10.1128/AEM.68.12.6283-6291.2002.
- 787 Zhang, Z., Nadezhina, E., and Wilkinson, K. J. (2011). Quantifying Diffusion in a Biofilm of  
788 *Streptococcus mutans*. *Antimicrob. Agents Chemother.* 55, 1075–1081.  
789 doi:10.1128/AAC.01329-10.
- 790
